# Supplementary material for: Agrin Binds BMP2, BMP4 and TGFβ1
Source: PubMed Central journal article supplement (PMC2874008; doi:10.1371/journal.pone.0010758), 2010-05-21
Supplement: pone.0010758.s001.pdf [file pone.0010758.s001.pdf]

**Table S1. Invertebrate agrins.** The file contains analyses of sequences from the invertebrate species *Trichoplax adhaerens*, *Caenorhabditis elegans*, *Apis mellifera*, *Tribolium castaneum*, *Strongylocentrotus purpuratus*, *Ciona intestinalis* that – according to the criteria described in the main text - are orthologs of vertebrate agrins.

**Abbreviations of Pfam domains:**

Kazal\_1, Kazal\_2 = FS; Laminin\_EGF = LamEGF; Laminin\_G\_1, Laminin\_G\_2 = LamG.

**Abbreviations of sequence features:**

signal peptide = SP; signal anchor = SA; transmembrane helix = TM

**Sequence analysis tools used:**

**Domain analysis:** Pfam A domains were identified by Pfam 23.0 (<http://pfam.sanger.ac.uk/>)

**Signal peptide:** signal peptides were identified by Signal P 3.0 (<http://www.cbs.dtu.dk/services/SignalP/>)

**Transmembrane helices:** transmembrane helices were identified by TMHMM 2.0 (<http://www.cbs.dtu.dk/services/TMHMM/>)

**Translation initiation sites:** Translation initiation sites were predicted by NetStart 1.0 (<http://www.cbs.dtu.dk/services/NetStart/>)

**Quality control of sequences:** Errors of sequences were detected and corrected as described in the main text.

**Species:** *Trichoplax adherens*

Sequence ID: [NCBI Reference Sequence: XP\\_002113830.1](#)

Sequence name: [hypothetical protein TRIADDRAFT\\_57635](#)

Sequence length: 1556 aa residues

**Domains by Pfam:**

| Pfam A domains | Start | End  | E-value |
|----------------|-------|------|---------|
| NtA            | 22    | 133  | 0.0066  |
| Kazal_2        | 169   | 212  | 4.6e-07 |
| Kazal_2        | 242   | 290  | 9.2e-08 |
| EGF            | 297   | 329  | 9.5e-06 |
| Laminin_G_2    | 364   | 496  | 4.3e-21 |
| EGF            | 526   | 559  | 8.6e-07 |
| EGF            | 568   | 602  | 1.5e-05 |
| Laminin_G_2    | 642   | 770  | 9.2e-33 |
| EGF            | 790   | 821  | 8.5e-08 |
| Laminin_G_2    | 862   | 991  | 2.3e-32 |
| Laminin_G_2    | 1048  | 1173 | 1.7e-31 |
| Laminin_G_2    | 1235  | 1356 | 1.2e-30 |
| Laminin_G_2    | 1410  | 1537 | 3.8e-34 |

**Region unassigned by Pfam at E-score < 10<sup>-2</sup>:** none

**Signal peptide by SignalP 3.0:**

|                | Start | End | Probability |
|----------------|-------|-----|-------------|
| Signal Peptide | 1     | 19  | 0.950       |
| Signal Anchor  | -     | -   | 0.011       |

**Domain Architecture by Pfam with E value =10<sup>-5</sup> cut-off value:**

SP, FS, FS, EGF, LamG, EGF, LamG, EGF, LamG, LamG, LamG, LamG

**Domain Architecture by Pfam with E value =10<sup>-2</sup> cut-off value:**

SP, NtA, FS, FS, EGF, LamG, EGF, EGF, LamG, EGF, LamG, LamG, LamG, LamG

**Domain Architecture verified by consensus procedure:**

**SP, NtA, FS, FS, EGF, LamG, EGF, EGF, LamG, EGF, LamG, LamG, LamG, LamG**

Alignments of the different domains of *Trichoplax adherens* agrin with the corresponding domains of other agrins are shown in **Figure S1** (NtA domains), **Figure S2** (FS domains), **Figure S3** (EGF domains), **Figure S4** (LamG domains).

**Sequence quality by MisPred:** No error detected

**The domain architecture of the protein is shown in Figure 1.**

**Deviation of domain architecture from those of secreted vertebrate agrins:** The protein contains only two (vs. nine) FS-domains, it lacks laminin EGF and SEA domains. It has three additional Laminin G domains that arose through duplication of the third Laminin G domain.

**Species:** *Caenorhabditis elegans*

Sequence ID: [GenBank ABF71722.3](#)

Sequence name: [Agrin \(synaptic protein\) homolog protein 1](#)

Sequence length: 1473 aa

**Domains by Pfam:**

| Pfam A domain | Start | End  | E-value |
|---------------|-------|------|---------|
| Kazal_1       | 173   | 220  | 1.2e-08 |
| Kazal_1       | 252   | 301  | 3.2e-13 |
| Kazal_1       | 327   | 371  | 7.5e-17 |
| Kazal_1       | 401   | 445  | 7e-13   |
| Kazal_1       | 456   | 516  | 9.9e-14 |
| Kazal_1       | 544   | 592  | 7.3e-11 |
| Kazal_2       | 612   | 660  | 2.3e-06 |
| Laminin_EGF   | 671   | 720  | 5.6e-17 |
| Laminin_EGF   | 723   | 767  | 1.7e-07 |
| Kazal_1       | 802   | 852  | 9.7e-09 |
| EB            | 870   | 914  | 0.00069 |
| Laminin_G_2   | 1109  | 1238 | 2.5e-20 |
| Laminin_G_2   | 1320  | 1453 | 6.3e-28 |

**Region unassigned by Pfam**

at E-score < 10<sup>-2</sup>:

|     |      |
|-----|------|
| 1   | 172  |
| 915 | 1108 |

**Signal peptide by SignalP 3.0:**

|                | Start | End | Probability |
|----------------|-------|-----|-------------|
| Signal Peptide | 1     | 22  | 0.741       |
| Signal Anchor  | -     | -   | 0.253       |

**Domain Architecture by Pfam with E value =10<sup>-5</sup> cut-off value:**

SP, FS, FS, FS, FS, FS, FS, FS, FS, LamEGF, LamEGF, FS, LamG, LamG.

**Domain Architecture by Pfam with E value =10<sup>-2</sup> cut-off value:**

SP, FS, FS, FS, FS, FS, FS, FS, FS, LamEGF, LamEGF, FS, EB, LamG, LamG.

**Domain Architecture verified by consensus procedure:**

SP, NtA, FS, FS, FS, FS, FS, FS, FS, FS, LamEGF, LamEGF, FS, EGF, LamG, LamG.

Alignments of selected domains of *Caenorhabditis elegans* agrin with the corresponding domains of other agrins are shown in **Figure S1** (NtA domains), **Figure S2** (FS domains) and **Figure S5** (LamEGF domains).

**Sequence quality by MisPred:** No error detected.

**The domain architecture of the protein is shown in Figure 1.**

**Deviation of domain architecture from those of secreted vertebrate agrins:** The protein contains eight (vs. nine) FS-domains, lacks SEA domain, it has one (vs. four) EGF-domain and two (vs. three) Laminin G domains.

**Species:** *Caenorhabditis briggsae*

Sequence ID: [NCBI Reference Sequence: XP\\_002630422.1](#)

Sequence name: [CBR-AGR-1 protein](#)

Sequence length: 1469 aa

**Domains by Pfam:**

| Pfam A domain | Start | End  | E-value |
|---------------|-------|------|---------|
| Kazal_1       | 154   | 203  | 1.4e-06 |
| Kazal_1       | 233   | 284  | 2e-05   |
| Kazal_2       | 314   | 354  | 4.1e-09 |
| Kazal_2       | 388   | 428  | 4.2e-09 |
| Kazal_2       | 456   | 499  | 4e-08   |
| Kazal_2       | 532   | 573  | 4e-06   |
| Kazal_2       | 598   | 641  | 2.5e-05 |
| Kazal_2       | 675   | 715  | 5.2e-08 |
| Laminin_EGF   | 724   | 773  | 4.7e-10 |
| Laminin_EGF   | 779   | 840  | 0.00019 |
| Kazal_2       | 865   | 917  | 1.3e-06 |
| Laminin_G_2   | 1147  | 1274 | 6.6e-16 |
| Laminin_G_2   | 1317  | 1450 | 1.1e-22 |

**Region unassigned by Pfam**

at E-score < 10<sup>-2</sup>:

|     |      |
|-----|------|
| 1   | 153  |
| 918 | 1146 |

**Signal peptide by SignalP 3.0:**

|                 | Start | End | Probability |
|-----------------|-------|-----|-------------|
| Signal peptide: | -     | -   | 0.005       |
| Signal anchor:  | -     | -   | 0.004       |

**Domain Architecture by Pfam with E value =10<sup>-5</sup> cut-off value:**

FS, FS, FS, FS, FS, FS, LamEGF, FS, LamG, LamG.

**Domain Architecture by Pfam with E value =10<sup>-2</sup> cut-off value:**

FS, FS, FS, FS, FS, FS, FS, FS, LamEGF, LamEGF, FS, LamG, LamG.

**Domain Architecture verified by consensus procedure:**

NtA, FS, FS, FS, FS, FS, FS, FS, FS, LamEGF, LamEGF, FS, EGF, LamG, LamG.

**Sequence quality by MisPred:** the sequence is incomplete at the N-terminal end.

**The domain architecture of the protein is similar to that of *C. elegans* agrin (shown in Figure 1) except that it has an additional FS domain.**

**Deviation of domain architecture from those of secreted vertebrate agrins:** The protein lacks SEA domain, it has one (vs. four) EGF-domain and two (vs. three) Laminin G domains.

**Species:** *Apis mellifera*

Sequence ID: [NCBI Reference Sequence: XP\\_391941.2](#)

Sequence name: [similar to agrin isoform 1](#)

Sequence length: 2397 aa

Database: NCBI

**Domains by Pfam:**

| Pfam A domain | Start | End  | E-value |
|---------------|-------|------|---------|
| Kazal_2       | 497   | 542  | 1.6e-13 |
| Kazal_1       | 572   | 621  | 4.8e-12 |
| Kazal_1       | 647   | 691  | 2.1e-17 |
| Kazal_1       | 721   | 765  | 1.7e-10 |
| Kazal_1       | 793   | 836  | 3.2e-16 |
| Kazal_1       | 862   | 913  | 1.6e-13 |
| Kazal_1       | 934   | 975  | 1.3e-11 |
| Kazal_2       | 1044  | 1089 | 1.8e-07 |
| Laminin_EGF   | 1176  | 1226 | 3e-24   |
| Laminin_EGF   | 1229  | 1259 | 2.4e-07 |
| Kazal_1       | 1308  | 1354 | 1.2e-14 |
| EB            | 1437  | 1477 | 0.00049 |
| EGF           | 1493  | 1525 | 2.1e-07 |
| Laminin_G_2   | 1561  | 1690 | 1.2e-29 |
| EGF           | 1810  | 1828 | 0.0065  |
| EGF           | 1835  | 1867 | 3.1e-08 |
| Laminin_G_2   | 1906  | 2034 | 5.2e-30 |
| EGF           | 2056  | 2089 | 4.2e-11 |
| Laminin_G_2   | 2174  | 2221 | 3.1e-06 |

**Region unassigned by Pfam**

at E-score < 10<sup>-2</sup>:

|      |      |
|------|------|
| 1    | 496  |
| 1691 | 1809 |
| 2222 | 2397 |

**Signal peptide by SignalP 3.0:**

|                | Start | End | Probability |
|----------------|-------|-----|-------------|
| Signal Peptide | -     | -   | 0.000       |
| Signal anchor  | -     | -   | 0.000       |

**Transmembrane by TMHMM 2.0:**

Number of predicted TMHs: 1

|                     |     |      |         |
|---------------------|-----|------|---------|
| Total prob of N-in: |     |      | 0.99866 |
| inside              | 1   | 436  |         |
| TMhelix             | 437 | 459  |         |
| outside             | 460 | 2397 |         |

**Domain Architecture by Pfam with E value =10<sup>-5</sup> cut-off value:**

TM, FS, FS, FS, FS, FS, FS, FS, FS, LamEGF, LamEGF, FS, EGF, LamG, EGF, LamG, EGF, LamG

**Domain Architecture by Pfam with E value =10<sup>-2</sup> cut-off value:**

TM, FS, FS, FS, FS, FS, FS, FS, FS, LamEGF, LamEGF, FS, EB, EGF, LamG, EGF, EGF, LamG, EGF, LamG.

**Domain Architecture verified by consensus procedure:**

**TM, FS, FS, FS, FS, FS, FS, FS, LamEGF, LamEGF, FS, EGF, LamG, EGF, EGF, LamG, EGF, LamG.**

**Sequence quality by MisPred:**

Violates rule 4: third Laminin G2 domain truncated; C-terminal part mispredicted.

**Deviation of domain architecture from those of vertebrate agrins:**

The protein lacks SEA domain.

The putative intracellular region of this type II transmembrane protein is much larger than those of vertebrate agrins. Analysis of the 5' region of the predicted agrin gene by NetStart indicates that this is due to misidentification of the translation initiation site in the 5' untranslated region of the gene.

The corrected sequence of *Apis mellifera* agrin protein is:

**Name: AGRIN\_APIME\_CORRECTED, 1901 aa**

**Sequence:**

MNGYRKNNFEAYGVYSDPEDDHGFLAEKKTPOYPYKGVVVNVSGESSVIDQKRAKDGRRQTEVVANSWCRFTIVLLLLVLLLIVIFVVFVAGIVLYLNYMSYKQRPRTIEEP  
CEKTYCSWGATCVVSENGKPLCQCPTDCPSTSEFVCGSDNVITYNYCHLRKSSCLERKSTRVKNQGACEIKDPCTKLNCSQGSQCVRSDGSEASCECLESCPSLGDHE  
GSSPVCCTGDGTDYPSLCEMNRAACAKGANITMAFQGGKDCPCGNVCEVEPEICQLDESRQPGCRCEGQGLEFAPVCGSDGKTYSNECSLRQEAACRSLSLRKVYNGACS  
SGINPCDEAKCGPYEQCVINRQGIASCECGAECPEVMRPFVPCARGGKTYTSLCELKRQACLTRTNIEVAYTGTGSRGCPSEKICQWGAICAEIGGTAICECPTCPAEFQ  
PVCDDGDI SYGNECQLRLEGCKHREIRVLYQGLCNECENKCKEFYAECKTDNGGEAKVCVPSKCEISTKDAQAQAAEKICGSDGVTYANECAMKVASCTSQALITVNYV  
GDCELARVECEHGAHCMAGVVCVPCDECPESGGEPVCGSDAKTYPSECELQKAAACGRDPKLPVLHVIFYGDGGERFAVAALTTMSTPAVVRLATTAVDVTSTQVREACK  
NINCFEATCELGPDDYPRCSCKFDCAISQENMRPVCSDLRITYSSLCAMKMEACRQQLRPRPLDLCQGMVVKPCNGDPLVDADGKEYDCGNGPERRDCPSNSYC  
HQTRRLARCCRKAQGTQVVKCSDSWHGCCPDGKTAARGPAGAGCPSLNCNRLGVSVDTCNPETGQCECKPGVGGKCDRCMPGYWGLPKISEGHQGCIPCGCSLFGSV  
REDCEQMTGRVCCKPDIQGGKCTICTDHNKILTLTGCSADTIPPIPTSCNELECYSGGQCSIEGGPHCVCPSSCPSDIPSPVPCGSDGQTYDNECELRLYACRHQADV  
VTQAFGHCRDDPMVNTDFPVKRYTAVQYTPAAAISPLSKSTRHLLVPEPDPYFYTHRAHQETITIDRDNLKHGVAAYRPTPATIRVVTTALLGDLDCTDDKDCITPNS  
ECSNGGCICSEGYAETSQRQECFANYVPVPTPEEFRACLSYPCHATSTCIDLPSATFVICRPNYTGRCFCEEMNKRDYEVASFDGKSYVRMNRKAYHKFSVEVEFKTY  
ADNGIILYNQKSDGTGDFVSLAIVDGHVQFRYNLGNPVIILTS PERVTMKTFFHSVAAKRYHKDGVLI FNDGEDVVVQSQGMLKSLDLNQDFTVGNMPTNYSKVYENIG  
TNHGFLGCI RKLKINRIHVLDLHVGRDKEILETYRVKECGENACANLPCQNGATCQPIFEEDLCNGHECRRIQKRGKGRSKSGMNI VRCKGTHCTLVDRERRSKKNARKR  
CATSKCDYDYEVYDENGVEYHGNVAVEKEYEPPNYRCICPPQFTGRNCEESLDPICGEPQHGATCDILPQGGYVCKCPPGRTGEHCEILDAAELTELLIPEMSGDGFLELP  
CLEGVAKAFSIELWFLTHASDGLLLYNGQLNNGRGDFISLNLVQAKLEFRNLGSGIANITS PDPVTLDTWHCVRI SRLGREGLVQLDDGTVARGLSGSPLTELNLEMP  
LYVGGKXHWREIHRLAGARTGLVGAIQRLMVNGKTYQNLAVNVTQHNTIYDGLPCSPNENPCHNGGVCLPLLNSYLKCKATGYNGLHCEFFMGYDVSTELTERPVRFK  
GDNFLQFRHRNGRRRKGQSNKFELRLRTHPDGLIAWIGRGRVHEHLISLHGGQVLLTYKSKNEQISLRSRERVDGCVFHQIRASRRRRTSMIQVDDSA PVKVSTEMT  
LLTTNGKLFVGGKPGHRGKGCVSDFVVDKRRQLGRRRRIEYCHDNDV

**Domains of the corrected bee agrin sequence identified by Pfam:**

| Pfam A domain | Start | End  | E-value |
|---------------|-------|------|---------|
| Kazal_2       | 132   | 177  | 1.6e-13 |
| Kazal_1       | 207   | 256  | 4.8e-12 |
| Kazal_1       | 282   | 326  | 2.1e-17 |
| Kazal_1       | 356   | 400  | 1.7e-10 |
| Kazal_1       | 428   | 471  | 3.2e-16 |
| Kazal_1       | 497   | 548  | 1.6e-13 |
| Kazal_1       | 569   | 610  | 1.3e-11 |
| Kazal_2       | 679   | 724  | 1.8e-07 |
| Laminin_EGF   | 811   | 861  | 3e-24   |
| Laminin_EGF   | 864   | 894  | 2.4e-07 |
| Kazal_1       | 943   | 989  | 1.2e-14 |
| EB            | 1072  | 1112 | 0.00049 |
| EGF           | 1128  | 1160 | 2.1e-07 |
| Laminin_G_2   | 1196  | 1325 | 1.2e-29 |
| EGF           | 1445  | 1463 | 0.0065  |
| EGF           | 1470  | 1502 | 3.1e-08 |

|             |      |      |         |
|-------------|------|------|---------|
| Laminin_G_2 | 1541 | 1669 | 5.2e-30 |
| EGF         | 1691 | 1724 | 4.2e-11 |
| Laminin_G_2 | 1771 | 1884 | 8.3e-25 |

**Region unassigned by Pfam  
at E-score < 10<sup>-2</sup>:**

|      |      |
|------|------|
| 1    | 131  |
| 1326 | 1444 |

**Domain Architecture by Pfam with E value =10<sup>-5</sup> cut-off value:**

TM, FS, FS, FS, FS, FS, FS, FS, FS, LamEGF, LamEGF, FS, EGF, LamG, EGF, LamG, EGF,  
LamG

**Domain Architecture by Pfam with E value =10<sup>-2</sup> cut-off value:**

TM, FS, FS, FS, FS, FS, FS, FS, FS, LamEGF, LamEGF, FS, EB, EGF, LamG, EGF, EGF, LamG,  
EGF, LamG.

**Domain Architecture verified by consensus procedure:**

TM, FS, FS, FS, FS, FS, FS, FS, FS, LamEGF, LamEGF, FS, EGF, LamG, EGF, EGF, LamG, EGF,  
LamG.

**The domain architecture of the corrected sequence of bee agrin is shown in Fig.1.**

Alignments of selected domains of *Apis mellifera* agrin with the corresponding domains of other agrins are shown in **Figure S2** (FS domains), **Figure S4** (LamG domains) and **Figure S5** (LamEGF domains).

**Species:** *Tribolium castaneum*

Sequence ID: [NCBI Reference Sequence: XP\\_001811978.1](#)

Sequence name: [similar to agrin](#)

Sequence length: 2027 aa

**Domains by Pfam:**

| Pfam A domain | Start | End  | E-value |
|---------------|-------|------|---------|
| Kazal_1       | 237   | 281  | 3.7e-15 |
| Kazal_1       | 311   | 360  | 4.4e-16 |
| Kazal_1       | 386   | 430  | 1.6e-18 |
| Kazal_1       | 460   | 504  | 9.6e-15 |
| Kazal_1       | 532   | 575  | 2.8e-17 |
| Kazal_1       | 601   | 648  | 1.2e-15 |
| Kazal_2       | 668   | 717  | 4.7e-07 |
| Kazal_2       | 803   | 839  | 0.00012 |
| Laminin_EGF   | 928   | 978  | 5.5e-20 |
| Laminin_EGF   | 981   | 1026 | 1.3e-05 |
| Kazal_1       | 1061  | 1107 | 6.3e-13 |
| EB            | 1213  | 1253 | 2.6e-05 |
| EGF           | 1266  | 1298 | 4.1e-09 |
| Laminin_G_1   | 1335  | 1467 | 8.6e-29 |
| EGF           | 1490  | 1522 | 7.1e-06 |
| EGF           | 1529  | 1561 | 2e-07   |
| Laminin_G_2   | 1576  | 1704 | 1.6e-29 |
| EGF           | 1736  | 1769 | 1.8e-09 |
| Laminin_G_1   | 1856  | 1918 | 9.6e-13 |

**Region unassigned by Pfam  
at E-score < 10<sup>-2</sup>:**

|      |      |
|------|------|
| 1    | 236  |
| 1108 | 1213 |
| 1919 | 2027 |

**Signal peptide by SignalP 3.0:**

|                | Start | End | Probability |
|----------------|-------|-----|-------------|
| Signal Peptide | -     | -   | 0.000       |
| Signal anchor  | -     | -   | 0.000       |

**Transmembrane by TMHMM 2.0:**

Number of predicted TMHs: 1

|                     |     |      |         |
|---------------------|-----|------|---------|
| Total prob of N-in: |     |      | 0.99981 |
| inside              | 1   | 175  |         |
| TMhelix             | 176 | 198  |         |
| outside             | 199 | 2027 |         |

**Domain Architecture by Pfam with E value =10<sup>-5</sup> cut-off value:**

TM, FS, FS, FS, FS, FS, FS, FS, FS, LamEGF, FS, EGF, LamG, EGF, LamG, EGF, LamG

**Domain Architecture by Pfam with E value =10<sup>-2</sup> cut-off value:**

TM, FS, FS, FS, FS, FS, FS, FS, FS, FS, LamEGF, LamEGF, FS, EB, EGF, LamG, EGF, EGF, LamG, EGF, LamG.

**Domain Architecture verified by consensus procedure:**

**TM, FS, FS, FS, FS, FS, FS, FS, FS, LamEGF, LamEGF, FS, EGF, LamG, EGF, EGF, LamG, EGF, LamG.**



### Sequence quality by MisPred:

Violates rule 4: third Laminin G2 domain truncated; C-terminal part mispredicted.

### Deviation from related agrins:

The protein lacks SEA domain.

The putative intracellular region of this type II transmembrane protein is larger than those of related vertebrate agrins. Analysis of the 5' region of the predicted agrin gene by NetStart indicates that this is due to misidentification of the translation initiation site in the 5' untranslated region of the agrin gene.

The corrected sequence of *Tribolium castaneum* agrin protein is:

### Name: AGRIN\_TRICA\_CORRECTED, 1885 aa

#### Sequence:

```
MRYTNGPQSAASMVASYGVYNDATLRADEDEDGFIIPRANVYPGVVNAAGDSSVLRGQEAAPAESYSNSCLISWCRPTILLILLVLLVVVFLVSGILLYFNYLMHKP
RQHYIEEPCEKTFCAWGAQCITGPDGRAMCQCPTHCKQKVDLVCCTGDKTYANRCQLRVASCKARLNTRVKHDGCEQNDPCRDKQCGFGARCVVSPDGRNASVCVCPDK
CPSYGDHTTSRPVCGSDGIDYRNQCELQKAACNTSNTNITIKFLGKCDPCAGVECAEPEVCQLDEHRNPVCRGDSCLPLEFTPVCGSDGKTYSNECTLRQEACRARKNLH
IIYRGKSSGINPCMSVRCTLGEBCAINKFGIARCQPPSCEPIMRPVCSKDGRTFPSECELKRTACLTRTTIEISYSGVCGEKGPCSEYQCQNGATCVERFGVAHCEC
PVCPAEFEPVCGSDGSIYSGNECKLRLEACKHPRNITVLYDGPCNGCETKCKDFYSVCERDSATEGRVCPCPKSCTDPELNDGTVCCTDGVTYANECELMTSCKMKQFLL
VAYKGNCDLQCQVECKYGGRCCEAGKCVCPNTCEGSGDEPVCASNMMTFPNECELQKAMCLQPTNSPPLSVVFGDCREKFPVAGSLSTLSPFTAQTNNIGPGLDNLTV
GPENTIIPDLSTVEKEACRDIHCDFEATCELGPDNFPRTCTCFDCASAAALVSAKPVASDLQIYPSLCAMKMEACQRQEELRLRPLDLQCQGMVVKPCNGEKPLTDPLTG
KELDCGSGPFRQDCPSGYSYCHQTRFRSRRCCPKDQGLLEQKSCEDSWHGCCPDGKTAAGQPNHAGCPSLCGCNKLGSYSDTCDPETQQCRCPGVGGAKCDRCEPGYWGL
PKISSGYHGCI PCGCSSTFGSVRDDCEQMTGRVCNPNVQVQKCTVCTSHDKVLGPNCGVADLTTSPPTTCKELTCYFGATCVERGGFAICECHTECPQENDAQQVVCSS
DGQTYASACELRQVACRTQKDIVVQAFGTCKDDMFSTDWPIRRYTTPQFTQPDSSNSPFLSKSTRHLLVDPDRYYYGSSGIMRPVQGVSYPAETDNKAAFEINVSATG
PNAIYNTRGGNYAPAYRPTPATVVRVITALLGDLCSDNSDCMIMYSHCVSGACTCLPNHSESSDRQECIADPNPTDEYRACSSSPCHHGSTCVDLPAATFTCVCE TNFTG
SLCETEVIHKQYNTPAFHGRSVYKLPKAYHKLSEIEVEFKTHSHDGLLLYNQKPKDGLGDFVSLAIVNGFVEFKYNLGNHVLIRSVDKIQLVGFHRVVIKRYHRDGI
LKLDEGEDVAGQAKGTLKALDLEDYVGFPLPSNYTRVYENIGTAKGFRGCIIRKLLKIGRRPIELHVNRRDDWVLGAEAVSECSDGSPCSAAPCANDAKCALITPETYRCEC
GPHYRGEFCEKPIEPCRSNPCKFGSTCTPLSPDAYICEPPGRTGTRCEMEDKYMGI VNPFEFSGSSYIRLPRLEGVRKTFSEIEVYFMPKAANGLILYNGQLKNGRGDFI
SLNLARGHLQFRFNLGSGIANLTTKETVNIKWHWARIFRDGREGILQLDNSSIVRGYSGTPLTELNLLELPFYIGSLSEWDEVHRLSGASKGYKGVQRILLNGKPLPI
SAKLPDCSFDNSNRNGCAFNVGSDYGLPCPISKNPCLNGLCVPELDQFICKCPSNTKGYCEISQEEPTAIKFNATFLQFRNRYRRRKPERRGNRYEIKLRTFASDAL
LLWRSKRSIREDYFSIAVNGYPEIISYNLGGKQDRMFFRSKTKIDDGKWHITQVRRRRKRVGFI SIDGEPPIKGLSKYGAISLRTNSKLWIGGTANLPQGLPSAYYKGEF
GCIQHILVNAKPLDMVSNNELNKNVFNCHDNEI
```

### Domains of the corrected sequence of beetle agrin identified by Pfam:

| Pfam A domain | Start | End  | E-value |
|---------------|-------|------|---------|
| Kazal_1       | 141   | 185  | 3.7e-15 |
| Kazal_1       | 215   | 264  | 4.4e-16 |
| Kazal_1       | 290   | 334  | 1.6e-18 |
| Kazal_1       | 364   | 408  | 9.6e-15 |
| Kazal_1       | 436   | 479  | 2.8e-17 |
| Kazal_1       | 505   | 552  | 1.2e-15 |
| Kazal_2       | 572   | 621  | 4.7e-07 |
| Kazal_2       | 707   | 743  | 0.00012 |
| Laminin_EGF   | 832   | 882  | 5.5e-20 |
| Laminin_EGF   | 885   | 930  | 1.3e-05 |
| Kazal_1       | 965   | 1011 | 6.3e-13 |
| EB            | 1117  | 1157 | 2.6e-05 |
| EGF           | 1170  | 1202 | 4.1e-09 |
| Laminin_G_1   | 1239  | 1371 | 8.6e-29 |
| EGF           | 1394  | 1426 | 7.1e-06 |
| EGF           | 1433  | 1465 | 2e-07   |
| Laminin_G_2   | 1503  | 1631 | 1.6e-29 |
| EGF           | 1663  | 1696 | 1.8e-09 |
| Laminin_G_1   | 1736  | 1867 | 6e-30   |

### Region unassigned by Pfam at E-score < 10-2:

|      |      |
|------|------|
| 1    | 140  |
| 1108 | 1213 |

**Domain Architecture by Pfam with E value = $10^{-5}$  cut-off value:**

TM, FS, FS, FS, FS, FS, FS, FS, FS, LamEGF, FS, EGF, LamG, EGF, LamG, EGF, LamG

**Domain Architecture by Pfam with E value = $10^{-2}$  cut-off value:**

TM, FS, FS, FS, FS, FS, FS, FS, FS, FS, LamEGF, LamEGF, FS, EB, EGF, LamG, EGF, EGF, LamG, EGF, LamG.

**Domain Architecture verified by consensus procedure:**

TM, FS, FS, FS, FS, FS, FS, FS, FS, FS, LamEGF, LamEGF, FS, EGF, LamG, EGF, EGF, LamG, EGF, LamG.

**Species: *Strongylocentrotus purpuratus***

Sequence ID: [NCBI Reference Sequence: XP\\_001194095.1](#)

Sequence ID: [NCBI Reference Sequence: XP\\_791472.2](#)

Sequence name: similar to agrin

Sequence length: 1397 aa

and

Sequence ID: [NCBI Reference Sequence: XP\\_791521.1](#)

Sequence name: similar to AGRN protein

Sequence length: 306 aa

**Domains of XP\_791472.2 by Pfam:**

| Pfam A domain | Start | End  | E-value |
|---------------|-------|------|---------|
| Kazal_1       | 54    | 98   | 4.8e-16 |
| Kazal_1       | 126   | 170  | 2.5e-16 |
| Kazal_1       | 198   | 242  | 2.1e-19 |
| Kazal_1       | 267   | 303  | 6e-11   |
| Kazal_2       | 342   | 386  | 7.8e-12 |
| Kazal_1       | 394   | 442  | 1.7e-12 |
| Kazal_1       | 467   | 511  | 2.3e-16 |
| Kazal_2       | 534   | 582  | 2.2e-11 |
| EGF           | 611   | 635  | 0.0033  |
| Kazal_1       | 634   | 678  | 3e-17   |
| Laminin_EGF   | 766   | 816  | 2e-18   |
| Laminin_EGF   | 819   | 863  | 2.6e-09 |
| Kazal_1       | 902   | 949  | 4.5e-10 |
| Laminin_G_1   | 1079  | 1220 | 2e-25   |
| EGF           | 1242  | 1276 | 7.7e-06 |
| EGF           | 1284  | 1316 | 0.00025 |
| Laminin_G_1   | 1351  | 1391 | 5.5e-15 |

**Region unassigned by Pfam  
at E-score < 10<sup>-2</sup>:**

950 1078

**Signal peptide by SignalP 3.0:**

|                | Start | End | Probability |
|----------------|-------|-----|-------------|
| Signal Peptide | 1     | 19  | 0.999       |
| Signal Anchor  | -     | -   | 0.000       |

**Sequence quality by MisPred:**

XP\_791472.2 violates rule 4: second (terminal) LamG domain truncated; C-terminal part mispredicted.

**Deviation from vertebrate agrins:**

1. The predicted protein has ten (vs. nine) follistatin domains has two (vs. four) EGF domains and lacks SEA domain.
2. The predicted protein has two (vs. three) LamG domains.
3. Unlike other secreted agrins, XP\_791472.2 lacks an NtA domain.

### Domains of XP\_791521.1 by Pfam:

| Pfam A domain | Start | End | E-value |
|---------------|-------|-----|---------|
| Laminin_G_2   | 2     | 65  | 2.1e-07 |
| Laminin_G_2   | 163   | 286 | 7.9e-30 |

### Signal peptide by SignalP 3.0:

Prediction: Non-secretory protein

Signal peptide probability: 0.000

Signal anchor probability: 0.000

### Transmembrane by TMHMM 2.0:

Number of predicted TMHs: 0

|                     |   |     |         |
|---------------------|---|-----|---------|
| Total prob of N-in: |   |     | 0.01187 |
| outside             | 1 | 306 |         |

### Sequence quality XP\_791521.1 by MisPred:

Violates rule 1 (has extracellular domains but lacks signal peptide/anchor or transmembrane sequences). Violates rule 4: first LamG domain truncated; N-terminal part mispredicted.

### Correction of the sequence of sea urchin agrin:

1. The mispredicted C-terminal part was corrected; the N-terminal and C-terminal parts of the second LamG domain of the corrected agrin sequence correspond to regions of the XP\_791472.2 and XP\_791521.1, respectively. The third LamG domain of the corrected sequence, missing from XP\_791472.2, is found on XP\_791521.1.

2. The NtA domain of the corrected sequence of sea urchin agrin was identified by searching the genome of *S. purpuratus* with the sequences of NtA domains of other chordates. The search has identified the exon encoding a signal peptide and the NtA domain of sea urchin agrin on the genomic contig of *S. purpuratus*, NW\_001292972.1.

The corrected sequence of *Strongylocentrotus purpuratus* agrin is:

### Name: AGRIN\_STRPU\_CORRECTED, 1897 aa

#### Sequence:

```
MQLLAFFTSVLVAVACLAMEQLPGVTVGVQIRNRGKTCQEYVPEKREEIANVVI SGYIHRIMRKPRTIMYDCDIEVVRVFKGSEALYSNVVPPMDGNTIQIGGFDP  
CDNAVTPGETRIFMMNKNNGHMLNNSVIRITLNNLVQAEAAVFGPCDMVLCIFGAVCEENEQGRPQCICDRQCPDMMAPVCGSDGTTYLSECFLDKASCEQKRRVYV  
ASQGSCEQDPCBEGVQCSFGSECMIEGDRATCECPNACPLIYSPICGSDGVSYGNTCEMEAASCRQQKEITLVNEGMCVEVDPCDENVTCNFGASCVVVEGAVASCLCP  
CLESYNPVCSDGVDDYNNNECDLNAACSSQKQSVTVVVFQGLCDPCQVEVEYENSVCKLDRNREPQPGCDNSCNPNSVINPVCSDGVVTYDNDCEINRAACLSNLEDILITFT  
EGPCEDGTHPCEFTCDYQCLVDDAGMPQCVCVTPCEVFTFVPCGSDGLTHSSMCHMEEASCERTDITLAKEGVCDGSNIIGCQTPACNKTEGAVSVCVCGTDGNNYPG  
LCALQEAACEAGIDIQVAINGPCESCECTTNC SHGSFCQMTPDGPTCTCS DHCQTINLPVCGSDGETYASECKLNVMACNARKNITVVSYGACEDCVGVTCTETERFNQVC  
YQGMVCVQESCPMSRSDDEDMVCGSDQVYDVTCHLKMMSACQAESNLTVVEYGPCEDFSGSGTEFPDYSGSGATPPNEFEFDLCEDETS CSFGGICRPLSADTYECICKFN  
CPAVRLPVCSDGATYGNECQLKEAACEQQSSIVLEKIGTCEDEVEMPCDGE SPLVNEATMEAYTCQEDNGGEDCPSGSYCHIHLPLGRFSACCAEQTSQPSMESVFGC  
CPDNQTEALGNSNGEGCPSVCNPNLGSYSVYCEPSNLQCPCKPGVGGKQCDRCEPGYDFLSLERNIGCKTCGCSYGSRRDDCQTS GACRCRRKAI GLKCNMCP  
LTMTPMGCMTEEEQMMSAITCSNLTC PFSAQCESTVEGQNTATCVCP TSSSCNTDVIQVVC GDNGETYPSRCQLQVFACKEQRNIMVQNEGACETVIVTPNEIRPGCE  
ESQFRCCPDQVTYATGPNNEGCS DASGTPPLAADQNAGQASASSPAPPSAATVALTTDAVVPSTKVSSTL SVAPFVSTALPTDSVLPPTTIVTIVLGCDS SPCQHGGT  
CQND EIA PGFRICPLGKGGPVCNEVVTFTT PPSFAGDSYLAYPEMDFMEVEIVIEFPQGATEGVLLYEAQTAEGNGDFISLAI VNNQVFRFLATDQSN GFDLGS AEP  
VVTSTVDLQLMTWHRRLRAYRSRRREGSLSDVGEPEVGTGTSEGVSGALNLGDFLIGYAVPPEVGLRLANTNQGFVGCIRYVEINSQELDISSGSSVEYGANVGECCND  
PCQSKEMPCFNGLCEALNAESYRQCIGDFFGTLCGDVLDVQCEGHMCHHEESTCVALPEGGYRCDPCDGRMGDMCTEEINKV VVPVGFAGNSYMQLP SLMMPDSDVIDV  
EFLTSSPDGVI F YNGQTADGRGDFISLNM RDGYLEFRYDLGSSIAEIKSVDR LALNEWHAVR VIRMGKSGEMILNDLPPVKGTSPPGASQLNLRQPLFIGGVSYSYGEVS  
RRAAITDGLNGAVRRFVVNEVDYSTLKDFAEAKVNVVEFFREDTMMNIP TAPRKLPEMPVTTT PPRPVVATRARPAMTTASVVVINTDDPLRFDGQTSIQYYNGVSKKQRA  
LRTHQIQLSFKTAEPNGALFWNGVGNADFQAVGVSDGYVEYAYNLGRGITRIRTTQKVDNNKWHVTVIITRNLIDASLQVDNEEFVMGQSRAGASQLD TDGFLYLGQGVN  
VPGSMESSTYTYTGCIQDVLLEDEVPLHLIYENAQGEKPSLFCSEF
```

### Domains of the corrected sequence of sea urchin agrin identified by Pfam:

| Pfam A domains | Start | End | E-value |
|----------------|-------|-----|---------|
| NtA            | 37    | 157 | 6.8e-22 |
| Kazal_1        | 180   | 224 | 4.8e-16 |
| Kazal_1        | 252   | 296 | 2.5e-16 |

|             |      |      |         |
|-------------|------|------|---------|
| Kazal_1     | 324  | 368  | 2.1e-19 |
| Kazal_1     | 393  | 429  | 6e-11   |
| Kazal_2     | 468  | 512  | 7.8e-12 |
| Kazal_1     | 520  | 568  | 1.7e-12 |
| Kazal_1     | 593  | 637  | 2.3e-16 |
| Kazal_2     | 660  | 708  | 2.2e-11 |
| Kazal_1     | 760  | 804  | 3e-17   |
| Laminin_EGF | 892  | 942  | 2e-18   |
| Laminin_EGF | 945  | 989  | 2.6e-09 |
| Kazal_1     | 1028 | 1075 | 4.5e-10 |
| EGF         | 1189 | 1222 | 1.6e-08 |
| Laminin_G_1 | 1256 | 1397 | 2e-25   |
| EGF         | 1419 | 1453 | 7.7e-06 |
| EGF         | 1461 | 1493 | 0.00025 |
| Laminin_G_2 | 1528 | 1656 | 1e-32   |
| Laminin_G_2 | 1754 | 1877 | 7.9e-30 |

**Region unassigned by Pfam:** 1076 1188

**Domain Architecture of the corrected sequence of *Strongylocentrotus purpuratus*:**

**SP, NtA, FS, LamEGF, LamEGF, FS, EGF, LamG, EGF, EGF, LamG, LamG.**

**The domain architecture of the corrected sequence of sea urchin agrin is shown in Fig.1.**

**Deviation from vertebrate agrins:**

The protein has ten (vs. nine) follistatin domains has three (vs. four) EGF domains and lacks SEA domain.

Alignments of selected domains of *Strongylocentrotus purpuratus* agrin with the corresponding domains of other agrins are shown in **Figure S1** (NtA domain), **Figure S2** (FS domains), **Figure S3** (EGF domains) **Figure S4** (LamG domains) and **Figure S5** (LamEGF domains).

**Species:** *Ciona intestinalis*

Sequence ID: [NCBI Reference Sequence: XP\\_002123658.1](#)

Sequence name: [similar to transmembrane agrin](#)

Sequence length: 2114 aa

**Domains by Pfam:**

| Pfam A domains | Start | End  | E-value |
|----------------|-------|------|---------|
| NtA            | 61    | 187  | 1.2e-06 |
| Kazal_1        | 227   | 273  | 7.2e-13 |
| Kazal_2        | 307   | 352  | 1.9e-07 |
| Kazal_1        | 384   | 430  | 3.7e-12 |
| Kazal_2        | 678   | 722  | 6.4e-08 |
| Kazal_1        | 748   | 792  | 6.5e-19 |
| Kazal_1        | 829   | 873  | 6.3e-14 |
| Laminin_EGF    | 904   | 955  | 1.3e-20 |
| Laminin_EGF    | 958   | 988  | 4.1e-08 |
| Kazal_1        | 1038  | 1085 | 9.9e-15 |
| SEA            | 1292  | 1401 | 0.0017  |
| Laminin_G_1    | 1455  | 1588 | 2.7e-34 |
| EGF_2          | 1631  | 1645 | 0.019   |
| EGF            | 1662  | 1695 | 5.8e-11 |
| Laminin_G_1    | 1737  | 1868 | 3.8e-32 |
| EGF            | 1888  | 1919 | 9.8e-08 |
| Laminin_G_2    | 1966  | 2094 | 9.7e-29 |

**Region unassigned by Pfam**

|                                         |      |      |
|-----------------------------------------|------|------|
| <b>at E-score &lt; 10<sup>-2</sup>:</b> | 431  | 677  |
|                                         | 1086 | 1291 |

**Signal peptide by SignalP 3.0:**

Prediction: Signal anchor

Signal peptide probability: 0.422

Signal anchor probability: 0.462

Max cleavage site probability: 0.224 between pos. 43 and 44

**Transmembrane by TMHMM 2.0:**

Number of predicted TMHs: 1

|                     |    |         |
|---------------------|----|---------|
| Total prob of N-in: |    | 0.98326 |
| inside              | 1  | 20      |
| TMhelix             | 21 | 43      |
| outside             | 44 | 2114    |

**Domain Architecture by Pfam with E value =10<sup>-5</sup> cut-off value:**

TM, NtA, FS, FS, FS, FS, FS, FS, LamEGF, LamEGF, FS, LamG, EGF, LamG, EGF, LamG

**Domain Architecture by Pfam with E value =10<sup>-2</sup> cut-off value:**

TM, NtA, FS, FS, FS, FS, FS, FS, LamEGF, LamEGF, FS, SEA, LamG, EGF, EGF, LamG, EGF, LamG.

**Domain Architecture verified by consensus procedure:**

TM, NtA, FS, FS, FS, FS, FS, FS, LamEGF, LamEGF, FS, SEA, LamG, EGF, EGF, LamG, EGF, LamG.

Sequence quality by MisPred: no error detected

**Deviation from vertebrate agrins:**

The protein contains only seven (vs. nine) FS-domains and only three (vs. four) EGF domains.

The protein is predicted to be a type II transmembrane protein but unlike transmembrane forms of other agrins it has an NtA domain. Analysis of the 5' region of the predicted agrin gene by NetStart indicates that this discrepancy is due to the fact that the translation initiation site was mispredicted in the 5' untranslated region of the gene. The highest probability translation initiation site corresponds to Met-22 of XP\_002123658.1

**The corrected sequence of *Ciona intestinalis* agrin corresponds to a secreted protein:**

**Signal peptide by SignalP 3.0:**

|                | Start | End | Probability |
|----------------|-------|-----|-------------|
| Signal Peptide | 1     | 22  | 0.998       |
| Signal Anchor  | -     | -   | 0.000       |

**Domain Architecture of the corrected sequence of *Ciona intestinalis* agrin:**

SP, NtA, FS, FS, FS, FS, FS, FS, LamEGF, LamEGF, FS, SEA, LamG, EGF, EGF, LamG, EGF, LamG.

The domain architecture of the protein is shown in Fig.1.

Alignments of selected domains of *Ciona intestinalis* agrin with the corresponding domains of other agrins are shown in **Figure S1** (NtA domains), **Figure S2** (FS domains), **Figure S3** (EGF domains), **Figure S5** (LamEGF domains) and **Figure S6** (SEA domains).

The corrected sequence of *Ciona intestinalis* agrin is:

**Name: AGRIN\_CIOIN\_CORRECTED, 2093 aa**

**Sequence:**

```
MYIRTLILLLSFLYLINTGAECYRIKRAVMLSMDDPQPAVECLDRTTTEKNSTSTVILTGTQVQCDVIRAGSYKCNIKIWRVMKGNLAMLNLI TIQKQGIILTSYKKKYV
DVYGLGNSAFCKSNVERADTRIFFLNKLNNRLVVSASLDRI TLKLNLENTQKVIIEGKRIKEEPPKPRDPCQEVLCGYGASCQAVDEDTTTCVCPVSCSASPTTEDILAP
ICGSDGVTYPNECRLRAAECMAQHRIKIKATTSCPEVDDRCLSTVTCTDFNAACVVRPDDGSLAPECCEPTCENVAVEPVCSDQRSHRSSCDLRRASCVEGRVITVVR
NSACNPCI DFNIESGIFLPMCSGSCTLDGNGEPCCE TLKCAANETELVCGSDGNTYENEC SLRRSACKTAKSITVIKQGSCTPKKEMTAVRGSLSIQADENC PGNCDL
QNKFTDFLTRMDTSVNQNLMSQNNQDIDGKTLGDFQITEVRQGSAILLFRAYSSTTSQPIAVNSNANSNNEWIYDRLYSDDNGALKVVARENGLNLTARNPRDDFV
EDVCMDLQCEHGAMCKITKSGSTLTPSCSCENVGAAESLPVTHACKQATDGNGVHRI FMNEAEARGESCTSNQILDFKDICQEAPI DPCAEIGGCSGVGEACIVMNGVG
SCQCITCGEEYQPVCTNDGQTFRSHCEVRRHNCLSKTNLIILSIGSCSQCDDIKCWYGAQCEVIAQGTTCVCTVCKTYLPVCGSDGQTY SNECEMVVAACPQKLEV
TVAHAGPCDEP THEGSGSAGDECGCLFGASC DTTIDEDANVCNFCNEAIGVAVCGSDGKTYPNMCELEKAQC NQQTPISLVSKGICKVGCQVSRYGCCEDGTTPAK
GVARSGCPEKCLNEHGSYGNACNPTTGQCVCRPGVGLRCDRCRPGYWNFRALAEKLTGCMSCRCHEFGSTRDDCQMTGRC SCKVGTGLKCTDCVSDGSWVTSV
CDNAATAAPS AVSCEDLVCRVGEQECVEINNAFECQCPSLTS CDNMDEAVVCGTNGITYADRCQLKVLACKVGVNVTVAHEGACMSNLEPLVEGP IVRPPLVPVTIETTR
MVQITTTTHPVPVVEPEPTPNAKPEPEPTSKPEPEPEPTPNAKPEPTPKSEPEPEPTSKPEPEPEPTSNPEPEPTPNAKPEPTSNPEPEPERTTKT PLVPKSEPETLAT
SKATPATVLPVPTTTL SVTKPKTTAATDEVECMYGDDEDCGGSGSGEGEVDNTEAPSVIPEIPEVPTPAAVQFIGQGTFFYSIDGNSLRHSKSLDVP GSEEFINYSNL
VEAEIMSLISNPLLD SVRAVRISSFRSASIFWGGVIVTFELHLTSGSDAGAIQDALNAASSENRYFTISELTD AERMLEEYTPVPALSNYTEDGPWTVPHFSGASYA
EFRKVNAFSEIITQLKFRSADPEGILFYSGQLNNGRDFISLAINNGYVEFRFDMGSMGLKLSKRPI NSTQWHTIVARRIRRDGMLQVDADPPVQGTSPGHASGLNLD
NFFVGGFNTYLEDRYQKQTVGDKGLTGCIIEVRIENENQLNITSNSDHCVSTFRLAECGASPCIPNQCQHSANCFITMQANI FTNKCECKDNYEGETQRENTGLSVK
KPNNPCSPNQCQGGAKCIEMPGEEFTCKCPPGRSGSLCMTNQSAALQGPSFMPAFAGDSYLELPSLGDVRSIMSI EILFYSNQPDGLIFYNGQKKS GKGFVSLNLK
NGFLEFKYNLQGAANIRSANPVS LNEWHIVVLSRAMRTGDLSDLNDFPVYGTSPSQHSFLDLKQPMYVGGFPDGVKFNPEAGVTTGLSGALQKQFQVNGVNLPI SPAGS
VSYFNVIAFNAHTCYRNP CDNNGVCHPRGAEYMCVCLPYTGDNCEQEHSTDLLQDEQATAYLDGTTKIMYRNAVKAI SRARTHNYEIVFRTTARHGLLLMVGKARE
GVDYIALA IHDGRLHLRFDLGS GFAHVISDQQINNGEWT TVKVNRMKNI GSLQVNNGLIKTATSPGLTNHLSN DGMLWLGGVYDRPRIGLYKSFFVFPVGCVASAKIH
DESIDLRA DAFNSPVVRS CNGR
```
