# Supplementary material for: Agrin Binds BMP2, BMP4 and TGFβ1
Source: PubMed Central journal article supplement (PMC2874008; doi:10.1371/journal.pone.0010758), 2010-05-21
Supplement: pone.0010758.s002.pdf [file pone.0010758.s002.pdf]

agrin\_triad\_nta CSPSPLOQRIT.....SNADYVITAKVVLN...INRNQQQPTIYSSNVEV  
agrin\_caeel\_nta CLKPRPTRSYIHSLENSDVIAGVITGISY...RVDSLVIENITV  
agrin\_strpu\_nta QREYPVEKRE.....ETANVVISGYIH..RIMR.KPRTIMYDCDIEV  
agrin\_cioin\_nta CLDRTTTEKN.....STSTVILTGTVQYCDVIRAG....SYKCNIKI  
agrin\_dandre\_nta CSEKELEKRE.....EEANVVLGTVE..EILNMDPVHNTYSCKVVRV  
agrin\_chicken\_nta CPERELQRRE.....EEANVVLGTVE..EIMNVDPVHHTYSCKVVRV  
agrin\_mouse\_nta CPERALERRE.....EEANVVLGTVE..EILNVDPVQHTYSCKVVRV  
agrin\_human\_nta CPERALERRE.....EEANVVLGTVE..EILNVDPVQHTYSCKVVRV

agrin\_triad\_nta I..EVFKPPRLSLPL.....SITIDNFGNTRICRSN  
agrin\_caeel\_nta IPRRRIYKGREYV.....EENKNIVIGNILETEPCAHR  
agrin\_strpu\_nta V..RVFKGSEAL.....YSNVVPPMD.GNTIQIGGFGDPAICDNA  
agrin\_cioin\_nta W..RVMKGNLSLAMNLITIQKQGITSMYKKKYVDVYGLGNSAFCKSN  
agrin\_dandre\_nta W..RYLKGKTMV.....NGEVL..LDGGNKVMIGGFGDPHICDNQ  
agrin\_chicken\_nta W..RYLKGKDIV.....THEIL..LDGGNKVVIGGFGDPLICDNQ  
agrin\_mouse\_nta W..RYLKGKDVV.....AQESL..LDGGNKVVIGGFGDPLICDNQ  
agrin\_human\_nta W..RYLKGKDLV.....ARESL..LDGGNKVVISGFGDPLICDNQ

agrin\_triad\_nta VNTNDTRILLFN.....GSSQKYVLSTSFYVTEERLKLIRTA  
agrin\_caeel\_nta LLASDVRIEFLT.....NQGVFLLDAPMIRLTGNEEERNKVA  
agrin\_strpu\_nta VTPGETRIEEMN.....KNGNHLMLNSSVIRITLNNLVQAEAA  
agrin\_cioin\_nta VERADTRIEFLNKL.....NNRLVVSASLDRITLKNLENTQKV  
agrin\_dandre\_nta VATGDTRIEFVNLAPEYMWPNHKNELMLNSSLMRITLRNLEEVEHC  
agrin\_chicken\_nta VSTGDTRIEFVNPAQYMWPAHRNELMLNSSLMRITLRNLEEVEHC  
agrin\_mouse\_nta VSTGDTRIEFVNPAAPPYLWPAHKNELMLNSSLMRITLRNLEEVEFC  
agrin\_human\_nta VSTGDTRIEFVNPAAPPYLWPAHKNELMLNSSLMRITLRNLEEVEFC
