# Supplementary material for: Agrin Binds BMP2, BMP4 and TGFβ1
Source: PubMed Central journal article supplement (PMC2874008; doi:10.1371/journal.pone.0010758), 2010-05-21
Supplement: pone.0010758.s003.pdf [file pone.0010758.s003.pdf]

agrin\_triad\_fs1 CSEIVCRMGATCSNEIQEG.....QCS..IDCHNLTKSE....P  
agrin\_triad\_fs2 CNNITCENYSICRLESNGITDNNPTCRCPNVC.....SLYYNP  
agrin\_caeel\_fs1 CEQSLCPFGSKC.....GLKTGVCEC.KARCRVVDV.....  
agrin\_caeel\_fs2 CEDLRGPGEDCVVNQINGILLA.KVCVCP.TQCPNYGDSVE.SSP  
agrin\_apime\_fs1 CEKTYCSWGATC..VVSENGK.P.LCQCP.TDCPS.....TSEP  
agrin\_apime\_fs2 CTKLNCSQGSQCVRSR.DG.SEA.SCECL.ESCPSLGDHEG.SSP  
agrin\_strpu\_fs1 CDMVLCIFGAVCEEN..EQGR.P.QCICDRQ.CPD.....MMA  
agrin\_strpu\_fs2 CEGVQCSFGSEC..MI.EGDR.A.TCECP.NACPL.....IYSP  
agrin\_cioin\_fs1 COEVLGCGYGASCQAV..DEDT.T.TCVCPVSCSASPPTEDILAP  
agrin\_cioin\_fs2 CSTVTCDFNAACVVRPSDDGSLAPECECP..TCENVA.....VEP  
agrin\_chick\_fs1 CRGMLCGFGAVCERSPTDPSQ.A.SCVCKKTACPV.....VVAP  
agrin\_chick\_fs2 CAEVTCSFGSTCVRSA.DG.QTA.GCVCEP.ASCSGVAE.....SI  
agrin\_rat\_fs1 CRGMLCGFGAVCEPSVEDPGR.A.SCVCKKNACPA.....TVAP  
agrin\_rat\_fs2 CANVTCSEFGSTCVPSA.DG.QTA.SCLCP.TTCFGAPD.....GT

agrin\_triad\_fs1 VCASDLKVVYSNTCOLERQSCLTGT...QLNILPRDNC  
agrin\_triad\_fs2 ICGNNNKTYYTQCHMIQDSC...QNNITVIKSYGGECE  
agrin\_caeel\_fs1 VCGSDHVSYSYSSFCCHLSVRSCVLAKNGVRLRVATKGPC  
agrin\_caeel\_fs2 VCGSSHGVYQSSCHLRHHACESKT...NITVKFFGRC  
agrin\_apime\_fs1 VCGSDNVTYTNYCHLRKSSCLERK...STRVKNQGAC  
agrin\_apime\_fs2 VCGTDGTDYPSLCEMNRAACAKGA...NITMAFQGKC  
agrin\_strpu\_fs1 VCGSDGTTYLSECFLDKASCEQKK...RVYVASQGSCE  
agrin\_strpu\_fs2 ICGSDGVSYGNTCEMEAASCROQK...EITLVNEGMC  
agrin\_cioin\_fs1 ICGSDGVTYPNECRLRAAECMAQH...RIKIKATTSC  
agrin\_cioin\_fs2 VCGSDQRSHRSSCDLRRASCVEGR...VITVVRNSAC  
agrin\_chick\_fs1 VCGSDYSTYSNECELEKAQCNOQR...RIKVISKGPC  
agrin\_chick\_fs2 VCGSDGKDYRSECDLNKHACDKQE...NVFKKFDGAC  
agrin\_rat\_fs1 VCGSDASTYSNECELQRAQCNOQR...RIRLLRQGPC  
agrin\_rat\_fs2 VCGSDGVDPSECCQLLSHACASQE...HIFKKFNGPC
