# Supplementary material for: Agrin Binds BMP2, BMP4 and TGFβ1
Source: PubMed Central journal article supplement (PMC2874008; doi:10.1371/journal.pone.0010758), 2010-05-21
Supplement: pone.0010758.s004.pdf [file pone.0010758.s004.pdf]

agrln\_triad\_egf1 C...RTFRCFQNGQC...LNRTFGYYTCQCPLGYTGTYC  
agrln\_triad\_egf2 C...SPNPCQNGGGC.SPLSG.NRYFQACPTDYAGLLC  
agrln\_triad\_egf3 C...ASNPCPANSTC.THEAGKSDSWKCLCPLGKIGQRC  
agrln\_triad\_egf4 CQR...KPCQNGAQC..SLGVQG..YLCNCPQYYTGENC  
agrln\_strpu\_egf1 C...DSSPCQHGGTC.QNDEI.APGFRCICPLGKGGPVC  
agrln\_strpu\_egf2 C.QSKEMPCFNGLC.EALNAES..YRCICQGDFFGTLC  
agrln\_strpu\_egf3 C...EGHMCHEESTC.VALPE.GG.YRCDCPDGRMGDMC  
agrln\_cioin\_egf1 CI...PNPCQHSANCFITMQANIFTNKCECKDNYEGETC  
agrln\_cioin\_egf2 C...SPNPCQGGAKC.IEMPG.EEEFTCKCFPGRSGLC  
agrln\_cioin\_egf3 CYR...NPCDNGGVC..HPRGAE..YMCVCLPYTGDNC  
agrln\_rat\_egf1 C...DSQPCLHGGTC.QDQDS.GKGFTCSCTAGRGG SVC  
agrln\_rat\_egf2 C...LPNPCHGGALC.QALEA.GM.FLCQCPPGFRFGPTC  
agrln\_rat\_egf3 C...QPNPCHGAAPC.RVLSS.GG.AKCECPLGRSGTFC  
agrln\_rat\_egf4 CTQALGNPCLNGGSC..VPREAT..YECLCPGGFSGLHC
