# Supplementary material for: Agrin Binds BMP2, BMP4 and TGFβ1
Source: PubMed Central journal article supplement (PMC2874008; doi:10.1371/journal.pone.0010758), 2010-05-21
Supplement: pone.0010758.s005.pdf [file pone.0010758.s005.pdf]

agrin\_triad\_lamg1 AIPSFHDGSYIRFKNTSTWDR...EVNLTIEFMPSVFDGLILIGCNLVSS  
agrin\_triad\_lamg2 FSPYFGGQSYLEYTD.KTSDYFAASSVTINLKVKPLKPNGLIFYGSOREDN  
agrin\_triad\_lamg3 PSVAFDGGNVYTLRNNISADEKEFNFTIELQLKTFNLHGLILWSGPRNYS  
agrin\_triad\_lamg4 PSLAFDGRSAYPYLNNVDNRLTVSSIQSFOLSKTLSSNGLILWHG.....  
agrin\_triad\_lamg5 PAYWFTPTS YITLLSAVTEKKNSFSSNRYEFLVRGYH.NGLLLWLWGQSQPN  
agrin\_triad\_lamg6 PPVSFSGSKAVRYSLDVNRGLRAFRQNSLRLEFKTRKSTAVLFWLG..NDN  
agrin\_apime\_lamg1 EVASF DGKSYVRMNRKAY....HKFSVEVEFKTYADNGIILYNQOKSDG  
agrin\_apime\_lamg2 LIPEMSGDGFLELPCLEGVAKA...FSIELWELTHASDGLLLYNGQLNNG  
agrin\_apime\_lamg3 RPVRFKGDNLFQFRHRNGRRRKGQSNKFELRLRTHHPDGLIAWIG.....  
agrin\_strpu\_lamg1 TTPSFAGDSYLAYPEMDAF....MEVEIVIEFQPGATEGVLLYEAQTAEG  
agrin\_strpu\_lamg2 VVPGFAGNSYMQLPSLM.MPDD...SVIDVEFLTSSPDGVIFYNGQTADG  
agrin\_strpu\_lamg3 DPLRFDFGQTSIQYYNGVSKKQRALRTHQIQLSFKTAEPNGALFWNG..VGN  
agrin\_human\_lamg1 PVPAFEGRSFLAFPTLRAY....HTLRLELEFRALEPQGLLLYNG.NARG  
agrin\_human\_lamg2 FLADFNGFSHLELRGLHTFARDLGEKMALEVEVELARGPSGLLLYNGOKTDG  
agrin\_human\_lamg3 DTLAFDGRFTFVEYLNVAVTESEKALQSNHFELSLRTEATQGLVWLVSGKATER

agrin\_triad\_lamg1 ...NGDYFALSLSRYIE.....ASFELGSGKGT.A.SSKIAVEVNR  
agrin\_triad\_lamg2 ...RGDFILLNLVVEGYLEFR.....FDLGSST.AVIRSASPLTLN  
agrin\_triad\_lamg3 QNQR.RPFIALAVTNGNIQLR.....FNLGTQDNHIT.STVRINDGN  
agrin\_triad\_lamg4 .NQKPGDFISVGIIRNKFVLELN.....YNLGSSTKTLGGVQVNDK  
agrin\_triad\_lamg5 PNR...DYLGVAVIVNRVQLR.....FNVGSGKIEIVDVI.VTDGY  
agrin\_triad\_lamg6 DPRLRSYMSAAVEAGYFKIR.....YNLGGGATSSITLTLRVDDNQ  
agrin\_apime\_lamg1 ...TGDFVSLAIVDGHVQFR.....YNLNG.PVILTSPEVMTKT  
agrin\_apime\_lamg2 ...RGDFISLNLVQAKLEFR.....FNLGSGI.ANITSPDPVTLDT  
agrin\_apime\_lamg3 ..RGKVEHLILSLHGGQVLLTYKSKNEQIS.....LRSRERVDDGV  
agrin\_strpu\_lamg1 ...NGDFISLAVINNOVEFRFLATDQNGFDLGSAPVITSTVDLQMT  
agrin\_strpu\_lamg2 ...RGDFISLNMRDGYLEFR.....YDLGSSI.AEIKSVDRALNE  
agrin\_strpu\_lamg3 .....ADFQAVGVSDGYVEYA.....YNLGRGITRI.RITQKVDNNK  
agrin\_human\_lamg1 ...K.DFLALALLDGRVQLR.....FDTGSG.PAVLTSAVPVEPGQ  
agrin\_human\_lamg2 ...KGDVSLALRRDRLEFR.....YDLGKGA.AVIRSREPVTLGA  
agrin\_human\_lamg3 .....ADYVALAIVDGHQLLS.....YNLGSQPVV.L.RSTVPVNTNR

agrin\_triad\_lamg1 WYRATVKRSGRDFTIQVNEEPPVVGKVPGLSELNSLTDIYGLTLP SGLST  
agrin\_triad\_lamg2 SHDINITRNGRYGTMRIDQQPEVRGIASGSFVLLSLFAPFYFGGH..P.NF  
agrin\_triad\_lamg3 WHTIKAYRIGRQANLTVDFEF.RSTTVSTGSPQIAVDGDLFLGGINTPKK  
agrin\_triad\_lamg4 WHKVLVDRQSRYGNTLVDGRS.ITGFANPSATELNAADYLYGGVENIAAK  
agrin\_triad\_lamg5 WHKVKIERNGSSGTLTVDGVSQSN.PREGASVLNVVDGNLILIGGTPNIATT  
agrin\_triad\_lamg6 WHTVYINRNLTNALLYVD.HLETSAISLQFQQLNVASFYFLGGVPE....  
agrin\_apime\_lamg1 FHSVAAKRYHKDGVLI FNDGDEVVGQSQGM LKSLDLNQDTFVG.NMPT.NY  
agrin\_apime\_lamg2 WHCVRISRLGREGVLQDDGTVARGLSGSPLTELNLEMPLYVGGI..K.HW  
agrin\_apime\_lamg3 FHQIRASRRRRTSMIQVDDAPVKVSTE..MTLLTTNGKLFVGGKPG....  
agrin\_strpu\_lamg1 WHRLRAYRSRREGSLSDVGEPEVTGTSEGVSGALNLGEDLFIGYAVPP.E.  
agrin\_strpu\_lamg2 WHAVRVI RMGKIDGEMILNDLPPVKGTSPPGASQLNLRQPLFIGGV..R.SY  
agrin\_strpu\_lamg3 WHTVIIITRNLDASLQVDNEEPPVVGQS RAGASQLD TDGFLYLGQGVNVP..  
agrin\_human\_lamg1 WHRELSRHWRRTGLVSDGETPVLGESPSTGTDGLNLDLDFVG.CVPE.DQ  
agrin\_human\_lamg2 WTRVSLERNRKGALRVGDGPRVLGESPVPHTVNLNKEPLYVGGGA..P.DF  
agrin\_human\_lamg3 WLRVVAHREQREGSLQVGNAPVTGSSPLGATQLD TDGALWLGGLPELPG

agrin\_triad\_lamg1 SNQFRSRIQMNQNFEGGCIRSLDINNIEYNLNVPSNKP DN VVSYYQLTRCV  
agrin\_triad\_lamg2 AAMN.SKTKIKTGLVGCIESVTINGQEKQL.....VKD.AIYGAGVSSCN  
agrin\_triad\_lamg3 NW..NL...YRYNYVGCIRNIQIQHHKVNI.....VTDIKVPQ.QHTTCE  
agrin\_triad\_lamg4 TS..NL...YYSFYEGCVKEVKLSGVSLNM.....QRDIQIRQ.RLYTCQ  
agrin\_triad\_lamg5 TS..NK...YLENYRGCLKNFVIDGFVNVL.....QL.MATESVNTKSCP  
agrin\_triad\_lamg6 NNIDYT...SNDNFIGCMANVEVNGKIVQL.....SDDAVDPNISLPRCQ  
agrin\_apime\_lamg1 SKV.YENIGTNHGF LGCIRKLIKINRIHVLDLHV...GRDKEILETYRVECCG  
agrin\_apime\_lamg2 REIH.RLAGARTGLVGAIQRLMVNGKTYQN.....LA.VNVTQHNTIYD  
agrin\_apime\_lamg3 .....HRGIKCVSDFVVDKRRLOLGRR.....RTEYCH  
agrin\_strpu\_lamg1 ..VGLRLANTNQGFVGCIRYVEINSQELDISS...S.GSSVEYGANVGECCG  
agrin\_strpu\_lamg2 GEVS.RRAAITDGLNGAVRRFVNEVDYST.....LKDFAEAKVNVEEFR  
agrin\_strpu\_lamg3 GSMESS...Y.TYTYTGCIQDVLDDEVPLHL.....YENAQGEKPSLF.CS  
agrin\_human\_lamg1 AAVALERTFVAGLRGCIRLLD VNNQRLELGI...G.PGAATRGSVGECCG  
agrin\_human\_lamg2 SKLA.RAAAVSSGFDAIQQLVSLGGRQLT.....PEHV.LRQVDVTSFA  
agrin\_human\_lamg3 PALPKA...YGTGEFVGLRDRVVGRRHPLHL.....LEDAV.TKPELRPCP
