# Supplementary material for: Agrin Binds BMP2, BMP4 and TGFβ1
Source: PubMed Central journal article supplement (PMC2874008; doi:10.1371/journal.pone.0010758), 2010-05-21
Supplement: pone.0010758.s006.pdf [file pone.0010758.s006.pdf]

agrin\_caeel\_lamegf1 CQCNRVGSFGHTCD.ETGQCKCRPGVAGIKCDHCLPSFWGIH.LIAQGALSC  
agrin\_caeel\_lamegf2 CGCSAFGSSRSDCETTTGKCECKNGALGDKCDLC.PNG.....SMMTAGGC  
agrin\_apime\_lamegf1 CNCNRLGSVSDTCNPETGOCECKPGVGGLKCDRCMPGYWGLPKI.SEGHQGC  
agrin\_apime\_lamegf2 CGCSLFGSVREDCEQMTGRCVCKPDIQGQKCTICTDHN.....KILLTLTGC  
agrin\_strpu\_lamegf1 CNCNPLGSYSVYCEPSNLQCPCKPGVGGKQCDRCEPGYYDFLSLERNG.IGC  
agrin\_strpu\_lamegf2 CGCSSYGSRRDDCDQTSGACRCRRKAIIGLKNMC.PEG.....LTMTPMGC  
agrin\_cioin\_lamegf1 CLCNEHGSYGNACNPTTGQCVCRPGVGGGLRCDRCRPGYWNFRALAEKLFTGC  
agrin\_cioin\_lamegf2 CRCHEFGSTRDDCDQMTGRCSCKVGVVTGLKCTDCVSDG.....SWVTSSVC  
agrin\_chick\_lamegf1 CQCNPYGSYGGTCDPATGQCSCKPGVGGLKCDRCEPGFWNFRGIVTDSKSGC  
agrin\_chick\_lamegf2 CNCDPVGSVRDDCEQMTGLCSCKTGTGMKCNQC.PNG.....SKMGMAGC  
agrin\_rat\_lamegf1 CHCNPHGSYSGTCDPATGQCS CRPGVGGGLRCDRCEPGFWNFRGIVTDGHS GC  
agrin\_rat\_lamegf2 CSCDPRGAVRDDCEQMTGLCS CRPGVAGPKCGQC.PDG.....QVLGHLGC
