# Supplementary material for: Agrin Binds BMP2, BMP4 and TGFβ1
Source: PubMed Central journal article supplement (PMC2874008; doi:10.1371/journal.pone.0010758), 2010-05-21
Supplement: pone.0010758.s007.pdf [file pone.0010758.s007.pdf]

agrin\_cioin\_sea AAVQFTGQGTfYSIDGNSLRHSKSLDVPGSEEFINYSNLVEA  
agrin\_disom\_sea PTKLFQGVLIIVEVEGQELFYTPMEDDPKSELFGETARSIEN  
agrin\_danre\_sea STMRFSGFLHLDKVEGQEVFYTPMEDDPKSELFGETARSIES  
agrin\_chick\_sea ATKVFQGVLIILEVEGQELFYTPEMADPKSELFGETARSIES  
agrin\_human\_sea ATKVFQGVLELEGEVEGQELFYTPEMADPKSELFGETARSIES

agrin\_cioin\_sea EIMSLISNPPLLDsvRAVRISsFRSASIFWGGVIVTFELHL.  
agrin\_disom\_sea ALNELFGNSNVKKDFKsvRVHGLGpsD....PVRIIVEVHFD  
agrin\_danre\_sea AMNELFRKSDVQKDFQsvHVRNLSPSN....SIIAHIEAHFD  
agrin\_chick\_sea ALDELFRNSDVKNDFKsIRVRDLGQSS....AVRVIVESHFD  
agrin\_human\_sea TLDDLFRNSDVKKDFRSVRLRDLGPGK....SVRAIVDVHFD

agrin\_cioin\_sea .TSGSDAGAIQDAL..NAASSENRYFTISELTDaERMLEEYt  
agrin\_disom\_sea PRtSYNSHDVQRALLOQVKQsRRKSIVVKKPEQDNVKIVDFD  
agrin\_danre\_sea PDtRENVGDIEGALLKQlKASKDTGIVVKKPEEENIHINNYG  
agrin\_chick\_sea PATSYTAADVQAASLkQIRASKKRtILVKKPQEHVKFMDFD  
agrin\_human\_sea PTTAFRAPDVARALLRQIQVSRRRSLGVRRLPQEHVRFMDFD
