# Supplementary material for: Agrin Binds BMP2, BMP4 and TGFβ1
Source: PubMed Central journal article supplement (PMC2874008; doi:10.1371/journal.pone.0010758), 2010-05-21
Supplement: pone.0010758.s008.pdf [file pone.0010758.s008.pdf]

agrin\_triad LKVKPLKPNGLIFYGSQREDNRGDFILLNLVEGYLEFRFDLGSQTAVIRS  
agrin\_caeel IVFKPYRTNGILFYWSVPSDPHTDFIAFAMIDAKPHFVYELGSGLSYIRG  
agrin\_caebr IAF.PYRTNGLLEFYWSVPSDPHTDFIAFAMIDAKPHFVYELGSGLSYIRG  
agrin\_apime LWFLTHASDGLLLYNGQLNNGRGDFISLNLVQAKLEFRFNLGSGIANITS  
agrin\_trica VYFMPKAANGILLYNGQLKNGRGDFISLNLARGHLQFRFNLGSGIANLTT  
agrin\_strpu VEFLTSSPDGVIFYNGQTADGRGDFISLNMRDGYLEFRYDLGSSIAETKS  
agrin\_cioin ILFYSNQPDGLIFYNGQKKSQKGFVSLNLKNGFLEFKYNLGOGAANIRS  
agrin\_disom VIFLAKDENGMIFYNGQKTDGRGDFVSLNLRDGYLEFKYDLGKGAAVLRS  
agrin\_chick VVFLAKSPSGMIFYNGQKTDGKGFVSLALHDGYLEYRYDLGKGAAVLRS  
agrin\_rat MVFLARGPSGLLLYNGQKTDGKGFVSLALHNRHLEFCYDLGKGAAVIRS  
agrin\_human VVFLARGPSGLLLYNGQKTDGKGFVSLALRRRLEFRYDLGKGAAVIRS

agrin\_triad ASPLTLNNSHDINITRNGRYGTMRIDQOPEVRCIAS...GS.FVLLSIFA  
agrin\_caeel .EPIPLNSWHTVRIERLAKDVSMFV.NETLVKKHTS.QSKNAHLDISKD  
agrin\_caebr .EPIPLNSWHTVRIERFAKDVSMYV.NGTLAKKYTS.QSKNAHLDILKND  
agrin\_apime PDPVTLDTWHCVRISRLGREGVLQDDGTVARGLSG...SPLTELNLEM  
agrin\_trica KETVNIKWHWARIFRDGREGILQLDNSSIVRGYSG...TPELTELNEL  
agrin\_strpu VDRALALNEWHAVRVIRMGKSGEMILNDLPPVKGTSP...PGASQLNLRQ  
agrin\_cioin ANPVSLEWHIVVLSRAMRTGDLSDLNFDPVYGTSP...SQHSFLDLKQ  
agrin\_disom KAPIPLNVWNVVTVERNKRKGLMKINKDELVSGESPKSRKAPHTALNLKE  
agrin\_chick KEPVPLNTWISVLLERSGRKGVMRINNGERVMGESPKSRKVPHAFNLKE  
agrin\_rat KEPIALGTWVRVFLERNKRK GALQVGDGPRVLGESPKSRKVPHTMLNLKE  
agrin\_human REPVTLGAWTRVSLERNKRK GALRVGDGPRVLGESPKSRKVPHTVLNLKE

agrin\_triad PFYFGGHPNFAAMNSKTKIKTGLVGCIESVTI  
agrin\_caeel ALYVGFVPEGIISHKVRKLNVPFEGELQELRI  
agrin\_caebr VLFVGFVPEGEISHKVRKLNVPFEGELQELRI  
agrin\_apime PLYVGGKHWREIHRLAGARTGLVGAIQRLMV  
agrin\_trica PFYIGSLSEWDEVHRLSGASKGYKCVIQRILL  
agrin\_strpu PLFIGGVRSYGEVSRRAAITDGLNGAVRRFVV  
agrin\_cioin PMYVGGFPDGVKFNPEAGVTTGLSGALQKQFQV  
agrin\_disom AFYVGGAPDFNKFARAAGIISGFTGAIQKLSL  
agrin\_chick PFYVGGAPDFSKLARAAAISTSFYGAQRISI  
agrin\_rat PLYIGGAPDFSKLARGAAVSSGFSGVIQLVSL  
agrin\_human PLYVGGAPDFSKLARAAAIVSSGFDGAIQLVSL
