# Supplementary material for: Agrin Binds BMP2, BMP4 and TGFβ1
Source: PubMed Central journal article supplement (PMC2874008; doi:10.1371/journal.pone.0010758), 2010-05-21
Supplement: pone.0010758.s009.pdf [file pone.0010758.s009.pdf]

β site

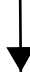

agrin\_triad CQNGAQC SLGVQGYLCNCPQY YTGENC SQAI.....EVFGPSVAFDGNVYTLRNNISA  
agrin\_trica CLNNGLCVPELDQFICKCPSNTKGKYCE.....ISQEETP.AIKFNGATFLQFRN....  
agrin\_apime CHNGGVCLPLLNSYLCKCATGYNGLHCEFFMGYDVSTELTERPVRFKGDNLFQFRH....  
agrin\_cioin CDNGGVCHPRGAEYMCVCLPY YTGDNCEQEHSTDLLQDEQATAIYLDGTTKIMYRNAVKA  
agrin\_disom CQNGGVCS PRLREYDCMCQRGFSGPQCEKALEEKSASGSESVA..FNGRTFIEYHNTVTR  
agrin\_chick CQNGGTCS PRLREYECACQRGFSGAHCEKVII EKAAGDAEAIA..FDGRTYMEYHNAVTK  
agrin\_rat CLNGGSCVPREATYECLCPGGFSGLHCEKGLVEKSVG DLETLA..FDGRTYIEYLNVAIE  
agrin\_human CLNGASCVPREAAAYVCLCPGGFSGPHCEKGLVEKSAGDVDTLA..FDGRTFV EYLNVAITE

agrin\_triad .....DEKEFNFN TIELOLKT FN LHGLILWSGPRNYSQNORRPFIALAVTNGNIQL  
agrin\_trica ....RGYRRRKPERGNRYEIKLRTFASDALLLWRSK...SRSIREDYFSIAV VNGYPEI  
agrin\_apime ....RNGRRRKQ QSNKFELRLRTHPDGLI AWIGR...G...KVEHLILSLHGGQVLL  
agrin\_cioin I.....SRARTHNNYETVFR TTA RHGLLLMVGK...ARE.GVDYIALA IHDGRLHL  
agrin\_disom SHLANEIPDEKAVQVNYFEMS IKT EATKGLILWSGK...IAE.KSDYIALAVVDGFVQM  
agrin\_chick SHLSNEIPA EKALQSNHFELSLRTEATQGLV LWIGK...AAE.RADYMALA IVDGHLQL  
agrin\_rat SELTNEIPA EKALQSNHFELSLRTEATQGLV LWIGK...AAE.RADYMALA IVDGHLQL  
agrin\_human SELTNEIPV EKALQSNHFELSLRTEATQGLV LWSGK...ATE.RADYVALA IVDGHLQL
