# Supplementary material for: Agrin Binds BMP2, BMP4 and TGFβ1
Source: PubMed Central journal article supplement (PMC2874008; doi:10.1371/journal.pone.0010758), 2010-05-21
Supplement: pone.0010758.s010.pdf [file pone.0010758.s010.pdf]

α site

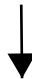

agr\_in\_disom S S T G P P T E V P N E R S T C D N T E F G C C S D G K T P S V D G E G S N C P P T K L F Q G V L I  
agr\_in\_danre T V A T T T L P T A E E R S S C D N T A F G C C P D G K T A A V N S E G T N C P S T M R F S G F L H  
agr\_in\_chick ~ S Q V T P T P . A I E R A T C Y N T P L G C C S D G K T A A A D A E G S N C P A T K V F Q G V L I  
agr\_in\_rat S I V V T H G P . P I E R A S C Y N S P L G C C S D G K T P S L D S E G S N C P A T K A F Q G V L E  
agr\_in\_human S S V A T P G P . P V E R A S C Y N S A L G C C S D G K T P S L D A E G S N C P A T K V F Q G V L E

agr\_in\_disom V E E V E G Q E L F Y T P E M D D P K S E L F G E T A R S I E N A L N E L F G N S N V K K D F K S V  
agr\_in\_danre L D K V E G Q E V F Y T P E M E D P K S E L F G E T A R S I E S A M N E L F R K S D V Q K D F Q S V  
agr\_in\_chick L E E V E G Q E L F Y T P E M A D P K S E L F G E T A R S I E S A L D E L F R N S D V K N D F K S I  
agr\_in\_rat L E G V E G Q E L F Y T P E M A D P K S E L F G E T A R S I E S T L D D L F R N S D V K K D F W S V  
agr\_in\_human L E G V E G Q E L F Y T P E M A D P K S E L F G E T A R S I E S T L D D L F R N S D V K K D F R S V

agr\_in\_disom R V H G L G P S D P V R I I V E V H F D P R T S Y N S H D V Q R A L L Q Q V K Q S R R K S I V V K K  
agr\_in\_danre R V R N L S P S N S I I A H F E A H F D P D T R E N V G D I E G A L L K O L K A S K D T G I V V K K  
agr\_in\_chick R V R D L G Q S S A V R V I V E S H F D P A T S Y T A A D V Q A A S L K Q I R A S K K R T I L V K K  
agr\_in\_rat R L R E L G P G K L V R A I V D V H F D P T T A E F Q A S D V G Q A L L R Q I Q V S R P W A L A V R R  
agr\_in\_human R L R D L G P G K S V R A I V D V H F D P T T A E R A P D V A R A L L R Q I Q V S R R R S L G V R R

agr\_in\_disom P E Q D N V K I V D F D  
agr\_in\_danre P E E N I R I N N Y G  
agr\_in\_chick P Q Q E H V K F M D F D  
agr\_in\_rat P L Q E H V R F L D F D  
agr\_in\_human P L Q E H V R F M D F D
